# Supplementary material for: Efficacy of intensive aphasia therapy in patients with chronic stroke: a randomised controlled trial
Source: PubMed Central journal article supplement — J Neurol Neurosurg Psychiatry. 2017 Dec 22;89(6):586–92. doi: 10.1136/jnnp-2017-315962 (PMC6031278; doi:10.1136/jnnp-2017-315962), 2017-12-22
Supplement: jnnp-2017-315962supp001.pdf [file jnnp-2017-315962supp001.pdf]

## Online Supplement

### **Efficacy of intensive aphasia therapy in patients with chronic stroke: A randomised controlled trial**

**Benjamin Stahl,<sup>1,2,3,4</sup> Bettina Mohr,<sup>5</sup> Verena Büscher,<sup>6</sup> Felix R. Dreyer,<sup>6</sup>  
Guglielmo Lucchese<sup>2,6</sup> and Friedemann Pulvermüller<sup>6,7</sup>**

<sup>1</sup> Department of Neurology, Charité Universitätsmedizin Berlin, Campus Mitte, Berlin, Germany

<sup>2</sup> Department of Neurology, Universitätsmedizin Greifswald, Greifswald, Germany

<sup>3</sup> Max Planck Institute for Human Cognitive and Brain Sciences, Leipzig, Germany

<sup>4</sup> Psychologische Hochschule Berlin, Berlin, Germany

<sup>5</sup> Department of Psychiatry, Charité Universitätsmedizin Berlin, Campus Benjamin Franklin, Berlin, Germany

<sup>6</sup> Brain Language Laboratory, Department of Philosophy and Humanities, WE4, Freie Universität Berlin, Berlin, Germany

<sup>7</sup> Berlin School of Mind and Brain, Humboldt-Universität zu Berlin, Berlin, Germany

#### **Correspondence:**

Benjamin Stahl, PhD  
Charité Universitätsmedizin Berlin  
Charitéplatz 1  
10117 Berlin, Germany  
Phone: +49 30 450 739 709  
Email: *benjamin.stahl@charite.de*

**Table I. Patient histories**

| Patient          | Gender | Age<br>(in years)  | Education level<br>(in years) | Months after<br>onset of stroke | Left-hemisphere<br>origin |
|------------------|--------|--------------------|-------------------------------|---------------------------------|---------------------------|
| 01               | Male   | 74                 | 17                            | 29                              | MCA ischemia              |
| 02               | Male   | 70                 | 13                            | 30                              | MCA ischemia              |
| 03               | Male   | 76                 | 9                             | 76                              | MCA ischemia              |
| 04               | Female | 58                 | 18                            | 146                             | MCA ischemia              |
| 05               | Male   | 61                 | 19                            | 19                              | MCA ischemia              |
| 06               | Female | 33                 | 13                            | 12                              | MCA ischemia              |
| 07               | Female | 82                 | 13                            | 197                             | MCA ischemia              |
| 08               | Female | 44                 | 12                            | 17                              | MCA ischemia              |
| 09               | Female | 36                 | 12                            | 27                              | MCA ischemia              |
| 10               | Male   | 64                 | 17                            | 41                              | MCA ischemia              |
| 11               | Female | 56                 | 21                            | 12                              | MCA ischemia              |
| 12               | Male   | 48                 | 13                            | 12                              | MCA ischemia              |
| 13               | Male   | 67                 | 16                            | 75                              | BG hemorrhage             |
| 14               | Male   | 57                 | 21                            | 74                              | MCA ischemia              |
| 15               | Female | 51                 | 13                            | 178                             | MCA ischemia              |
| <b>Group I</b>   |        |                    |                               |                                 |                           |
| <b>Mean (SD)</b> |        | <b>58.5 (14.3)</b> | <b>15.1 (3.6)</b>             | <b>63.0 (62.3)</b>              |                           |
| 16               | Male   | 67                 | 19                            | 27                              | MCA ischemia              |
| 17               | Female | 51                 | 18                            | 23                              | MCA ischemia              |
| 18               | Female | 77                 | 9                             | 23                              | MCA ischemia              |
| 19               | Male   | 74                 | 19                            | 24                              | MCA ischemia              |
| 20               | Male   | 84                 | 11                            | 53                              | MCA ischemia              |
| 21               | Female | 60                 | 12                            | 253                             | MCA ischemia              |
| 22               | Female | 41                 | 12                            | 95                              | MCA ischemia              |
| 23               | Female | 39                 | 11                            | 45                              | MCA ischemia              |
| 24               | Male   | 34                 | 14                            | 54                              | MCA ischemia              |
| 25               | Male   | 65                 | 13                            | 51                              | MCA ischemia              |
| 26               | Male   | 75                 | 16                            | 209                             | MCA ischemia              |
| 27               | Male   | 45                 | 13                            | 23                              | MCA ischemia              |
| 28               | Female | 58                 | 17                            | 12                              | MCA ischemia              |
| 29               | Male   | 76                 | 10                            | 75                              | MCA ischemia              |
| 30               | Male   | 81                 | 13                            | 44                              | MCA ischemia              |
| <b>Group II</b>  |        |                    |                               |                                 |                           |
| <b>Mean (SD)</b> |        | <b>61.8 (16.5)</b> | <b>13.8 (3.3)</b>             | <b>67.4 (70.5)</b>              |                           |

Patients are listed according to training intensity: Group I (4 hours per day), and Group II (2 hours per day).

MCA: Middle cerebral artery; BG: Basal ganglia; SD: Standard deviation

**Table II. Baseline test scores**

| Patient          | AAT<br>Token Test | AAT<br>Repetition | AAT<br>Naming     | AAT<br>Comprehension | CBTT             | Aphasia<br>type |
|------------------|-------------------|-------------------|-------------------|----------------------|------------------|-----------------|
| 01               | 43                | 50                | 42                | 40                   | 4                | Wernicke        |
| 02               | 52                | 45                | 49                | 52                   | 7                | Broca           |
| 03               | 63                | 45                | 53                | 52                   | 4                | Broca           |
| 04               | 66                | 59                | 61                | 59                   | 5                | Broca           |
| 05               | 41                | 50                | 38                | 46                   | 4                | Global          |
| 06               | 49                | 62                | 53                | 63                   | 6                | Broca           |
| 07               | 47                | 49                | 48                | 46                   | 4                | Broca           |
| 08               | 42                | 55                | 47                | 38                   | 4                | Broca           |
| 09               | 33                | 42                | 42                | 39                   | 7                | Broca           |
| 10               | 42                | 45                | 39                | 37                   | 5                | Global          |
| 11               | 49                | 54                | 49                | 37                   | 7                | Broca           |
| 12               | 48                | 51                | 47                | 39                   | 6                | Broca           |
| 13               | 65                | 63                | 62                | 66                   | 4                | Broca           |
| 14               | 54                | 51                | 59                | 64                   | 7                | Broca           |
| 15               | 46                | 50                | 50                | 55                   | 6                | Broca           |
| <b>Group I</b>   |                   |                   |                   |                      |                  |                 |
| <b>Mean (SD)</b> | <b>49.3 (9.4)</b> | <b>51.4 (6.3)</b> | <b>49.3 (7.4)</b> | <b>48.9 (10.6)</b>   | <b>5.3 (1.3)</b> |                 |
| 16               | 46                | 58                | 49                | 55                   | 5                | Broca           |
| 17               | 42                | 43                | 46                | 39                   | 5                | Amnesic         |
| 18               | 49                | 41                | 48                | 47                   | 6                | Broca           |
| 19               | 54                | 62                | 61                | 63                   | 5                | Broca           |
| 20               | 58                | 50                | 60                | 50                   | 4                | Broca           |
| 21               | 55                | 59                | 63                | 64                   | 5                | Broca           |
| 22               | 47                | 48                | 51                | 39                   | 6                | Broca           |
| 23               | 59                | 56                | 59                | 78                   | 7                | Broca           |
| 24               | 57                | 59                | 68                | 78                   | 7                | Broca           |
| 25               | 52                | 57                | 58                | 51                   | 7                | Broca           |
| 26               | 46                | 44                | 41                | 36                   | 6                | Broca           |
| 27               | 33                | 48                | 43                | 38                   | 6                | Global          |
| 28               | 43                | 44                | 40                | 51                   | 6                | Global          |
| 29               | 42                | 42                | 34                | 37                   | 3                | Global          |
| 30               | 69                | 54                | 56                | 54                   | 6                | Broca           |
| <b>Group II</b>  |                   |                   |                   |                      |                  |                 |
| <b>Mean (SD)</b> | <b>50.1 (8.9)</b> | <b>51.0 (7.2)</b> | <b>51.8 (9.8)</b> | <b>52.0 (13.8)</b>   | <b>5.6 (1.1)</b> |                 |

Patients are listed according to training intensity: Group I (4 hours per day), and Group II (2 hours per day).

AAT: Aachen Aphasia Test<sup>1</sup>; CBTT: Corsi Block-Tapping Task<sup>2</sup>; SD: Standard deviation

## References

- 1 Huber W, Poeck K, Willmes K. The Aachen Aphasia Test. *Adv Neurol* 1984;42:291–303.
- 2 Kessels RP, van Zandvoort MJ, Postma A, et al. The Corsi BlockTapping Task: standardization and normative data. *Appl Neuropsychol* 2000;7:252–8.
